# Supplementary material
Source: PubMed Central journal article supplement (PMC3071914)
Supplement: mmc1.pdf [file mmc1.pdf]

**Supplemental Data**

**American Journal of Human Genetics, Volume 88**

**Comparing Phylogeny and the Predicted Pathogenicity  
of Protein Variations Reveals Equal Purifying Selection  
across the Global Human Mitochondrial DNA Diversity**

**Luisa Pereira, Pedro Soares, Predrag Radivojac, Biao Li, and David C. Samuels**

## Supplemental Figures

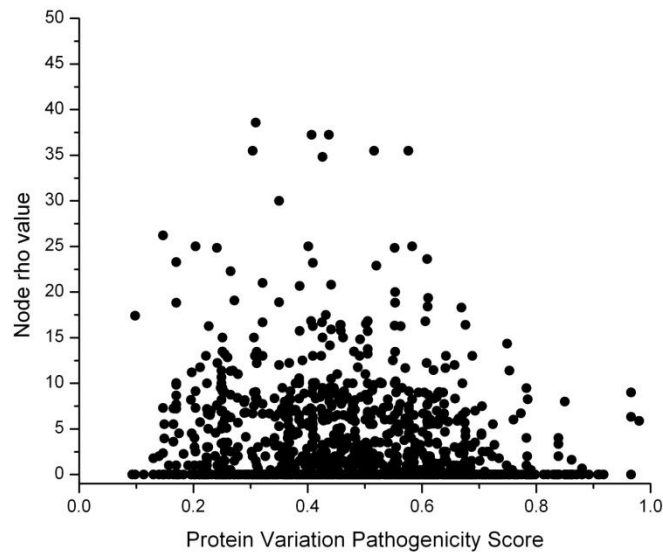

**Figure S1.** The pathogenicity scores for all non-synonymous amino acid variations occurring in the three human mtDNA subtrees as a function of the  $\rho$  value.

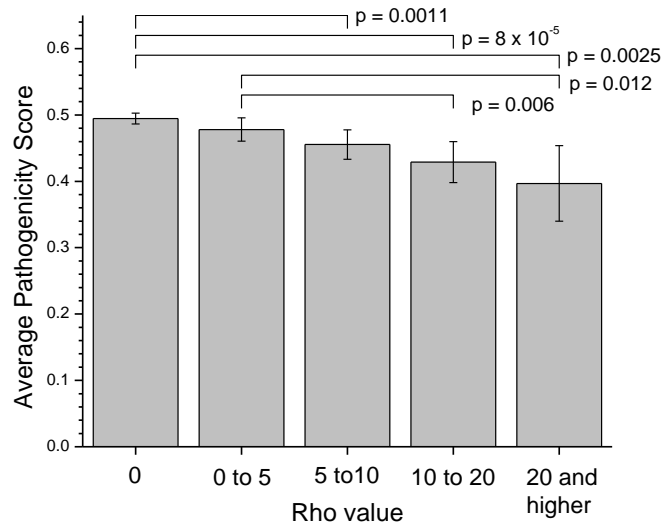

**Figure S2.** The average pathogenicity scores for all non-synonymous amino acid variations occurring in the three human mtDNA subtrees binned by the  $\rho$  value. There is a slight but steady and significant decrease in the average pathogenicity score as the rho value increased.

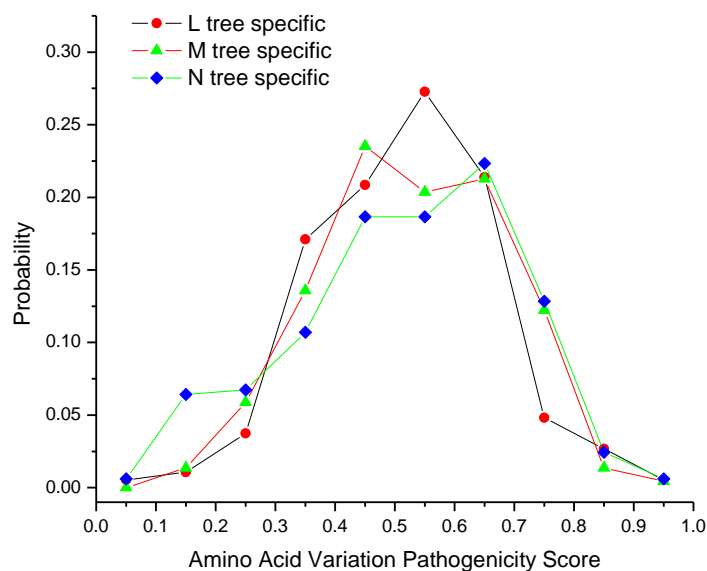

**Figure S3.** Distributions of pathogenicity scores in the three trees when analyzing only the set of amino acid variants which were unique to each tree. There are no statistically significant differences in these three data sets.

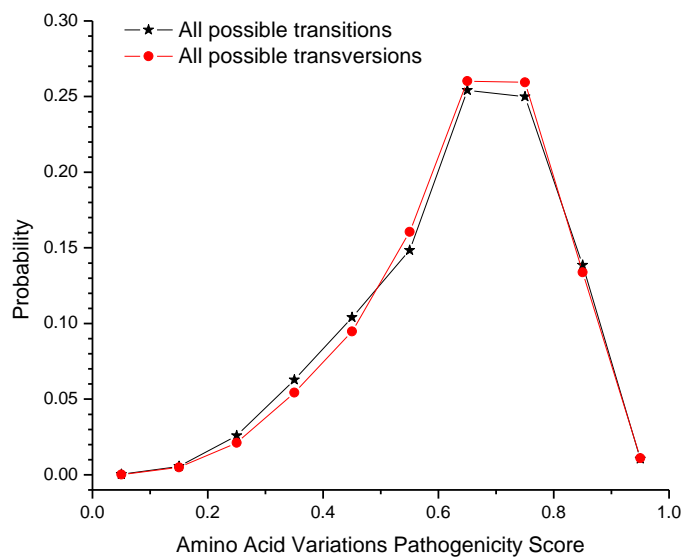

**Figure S4.** Distributions of pathogenicity scores for “all possible transitions” and “all possible transversions”. The list of the “all possible” variants was split into those arising from transitions and those arising from transversions. The mean pathogenicity score was 0.637 for transitions and 0.643 for transversions. Due to the large number of data values, this slight difference was statistically significant ( $p = 0.004$ ). However, as these distributions are nearly identical, there is no strong difference in the pathogenicity scores for transitions compared to transversions.

Table S2. List of all pathogenic single amino acid variations in mtDNA encoded proteins listed in OMIM

| <b>OMIM ID</b> | <b>Gene</b>    | <b>Variation</b> | <b>Amino Acid Change</b> | <b>Mutpred Score</b> |
|----------------|----------------|------------------|--------------------------|----------------------|
| *516000.0001   | <i>MT-ND1</i>  | m.3460A          | Ala52Thr                 | 0.857                |
| *516000.0002   | <i>MT-ND1</i>  | m.4160C          | Leu285Pro                | 0.853                |
| *516000.0003   | <i>MT-ND1</i>  | m.4216C          | Tyr304His                | 0.611                |
| *516000.0004   | <i>MT-ND1</i>  | m.3394C          | Tyr30His                 | 0.783                |
| *516000.0005   | <i>MT-ND1</i>  | m.3397G          | Met31Val                 | 0.723                |
| *516000.0006   | <i>MT-ND1</i>  | m.4136G          | Thr277Cys                | 0.374                |
| *516000.0007   | <i>MT-ND1</i>  | m.3308C          | Met1Thr                  | 0.577                |
| *516000.0010   | <i>MT-ND1</i>  | m.4171A          | Leu289Met                | 0.591                |
| *516000.0011   | <i>MT-ND1</i>  | m.3796G          | Thr164Ala                | 0.54                 |
| *516000.0012   | <i>MT-ND1</i>  | m.3697A          | Gly131Ser                | 0.854                |
| *516000.0013   | <i>MT-ND1</i>  | m.3946A          | Glu214Lys                | 0.778                |
| *516000.0014   | <i>MT-ND1</i>  | m.3949C          | Tyr215His                | 0.76                 |
| *516000.0015   | <i>MT-ND1</i>  | m.3733A          | Glu143Lys                | 0.885                |
| *516001.0001   | <i>MT-ND2</i>  | m.4917G          | Asn150Asp                | 0.628                |
| *516001.0002   | <i>MT-ND2</i>  | m.5244A          | Gly259Ser                | 0.866                |
| *516001.0003   | <i>MT-ND2</i>  | m.4640A          | Ile57Met                 | 0.604                |
| *516001.0006   | <i>MT-ND2</i>  | m.4681C          | Leu71Pro                 | 0.8                  |
| *516002.0001   | <i>MT-ND3</i>  | m.10191C         | Ser45Pro                 | 0.394                |
| *516002.0002   | <i>MT-ND3</i>  | m.10398G         | Thr114Ala                | 0.17                 |
| *516002.0003   | <i>MT-ND3</i>  | m.10158C         | Ser34Pro                 | 0.394                |
| *516002.0004   | <i>MT-ND3</i>  | m.10197A         | Ala47Thr                 | 0.594                |
| *516003.0001   | <i>MT-ND4</i>  | m.11778A         | Arg340His                | 0.852                |
| *516003.0002   | <i>MT-ND4</i>  | m.11084G         | Thr109Ala                | 0.482                |
| *516003.0003   | <i>MT-ND4</i>  | m.11696G         | Val313Ile                | 0.581                |
| *516003.0004   | <i>MT-ND4</i>  | m.11777A         | Arg340Ser                | 0.836                |
| *516004.0001   | <i>MT-ND4L</i> | m.10563C         | Cys32Arg                 | 0.766                |
| *516004.0002   | <i>MT-ND4L</i> | m.10663C         | Val65Ala                 | 0.479                |
| *516005.0001   | <i>MT-ND5</i>  | m.13708A         | Ala458Thr                | 0.409                |
| *516005.0002   | <i>MT-ND5</i>  | m.13730A         | Gly465Glu                | 0.825                |
| *516005.0003   | <i>MT-ND5</i>  | m.12706C         | Phe124Leu                | 0.704                |
| *516005.0004   | <i>MT-ND5</i>  | m.12770G         | Glu145Gly                | 0.763                |
| *516005.0005   | <i>MT-ND5</i>  | m.13045C         | Met237Leu                | 0.713                |
| *516005.0006   | <i>MT-ND5</i>  | m.13084T         | Ser250Cys                | 0.685                |
| *516005.0007   | <i>MT-ND5</i>  | m.13513A         | Asp393Asn                | 0.834                |
| *516005.0008   | <i>MT-ND5</i>  | m.13042A         | Ala236Thr                | 0.754                |
| *516005.0009   | <i>MT-ND5</i>  | m.12848T         | Ala171Val                | 0.738                |
| *516005.0010   | <i>MT-ND5</i>  | m.12397G         | Thr21Ala                 | 0.426                |
| *516006.0001   | <i>MT-ND6</i>  | m.14484C         | Met64Val                 | 0.627                |
| *516006.0002   | <i>MT-ND6</i>  | m.14459A         | Ala72Val                 | 0.623                |

|              |                |          |           |       |
|--------------|----------------|----------|-----------|-------|
| *516006.0004 | <i>MT-ND6</i>  | m.14495G | Leu60Ser  | 0.634 |
| *516006.0005 | <i>MT-ND6</i>  | m.14453A | Ala74Val  | 0.657 |
| *516006.0006 | <i>MT-ND6</i>  | m.14482A | Met64Ile  | 0.585 |
| *516006.0007 | <i>MT-ND6</i>  | m.14487C | Met63Val  | 0.644 |
| *516006.0008 | <i>MT-ND6</i>  | m.14319C | Asn119Asp | 0.446 |
| 516060.0001  | <i>MT-ATP6</i> | m.8993G  | Leu156Arg | 0.824 |
| 516060.0002  | <i>MT-ATP6</i> | m.8993C  | Leu156Pro | 0.846 |
| 516060.0003  | <i>MT-ATP6</i> | m.9101C  | Ile192Thr | 0.571 |
| 516060.0005  | <i>MT-ATP6</i> | m.9176C  | Leu217Pro | 0.719 |
| 516060.0006  | <i>MT-ATP6</i> | m.8851C  | Trp109Arg | 0.78  |
| 516060.0008  | <i>MT-ATP6</i> | m.9185C  | Leu220Pro | 0.751 |
| 516060.0010  | <i>MT-ATP6</i> | m.8528C  | Met1Trp   | 0.907 |
| 516070.0001  | <i>MT-ATP8</i> | m.8393T  | Pro10Ser  | 0.569 |
| 516070.0003  | <i>MT-ATP8</i> | m.8528C  | Trp55Arg  | 0.77  |
| *516030.0002 | <i>MT-CO1</i>  | m.6742C  | Ile280Thr | 0.69  |
| *516030.0003 | <i>MT-CO1</i>  | m.6721C  | Met273Thr | 0.681 |
| *516030.0004 | <i>MT-CO1</i>  | m.6480A  | Val193Ile | 0.664 |
| *516030.0008 | <i>MT-CO1</i>  | m.6489A  | Leu196Ile | 0.641 |
| *516030.0009 | <i>MT-CO1</i>  | m.6328T  | Ser142Phe | 0.831 |
| *516030.0010 | <i>MT-CO1</i>  | m.6277G  | Gly125Asp | 0.938 |
| *516040.0001 | <i>MT-CO2</i>  | m.7587C  | Met1Thr   | 0.648 |
| *516040.0002 | <i>MT-CO2</i>  | m.8009A  | Val142Met | 0.581 |
| *516040.0003 | <i>MT-CO2</i>  | m.7671A  | Met29Lys  | 0.689 |
| *516050.0001 | <i>MT-CO3</i>  | m.9438A  | Gly78Ser  | 0.839 |
| *516050.0002 | <i>MT-CO3</i>  | m.9804A  | Ala200Thr | 0.708 |
| *516020.0001 | <i>MT-CYB</i>  | m.15257A | Asp171Asn | 0.785 |
| *516020.0002 | <i>MT-CYB</i>  | m.15812A | Val356Met | 0.518 |
| *516020.0003 | <i>MT-CYB</i>  | m.14985A | Arg80His  | 0.833 |
| *516020.0004 | <i>MT-CYB</i>  | m.15572C | Phe276Leu | 0.69  |
| *516020.0005 | <i>MT-CYB</i>  | m.15615A | Gly290Asp | 0.727 |
| *516020.0006 | <i>MT-CYB</i>  | m.14846A | Gly34Ser  | 0.846 |
| *516020.0009 | <i>MT-CYB</i>  | m.15197C | Ser151Pro | 0.715 |
| *516020.0010 | <i>MT-CYB</i>  | m.15579G | Tyr278Cys | 0.729 |
| *516020.0011 | <i>MT-CYB</i>  | m.15498A | Gly251Asp | 0.502 |
| *516020.0012 | <i>MT-CYB</i>  | m.14849C | Ser35Pro  | 0.733 |
| *516020.0014 | <i>MT-CYB</i>  | m.15497A | Gly251Ser | 0.477 |
